# Supplementary material for: Nano-Zirconium Dioxide Catalyzed Multicomponent Synthesis of Bioactive Pyranopyrazoles That Target Cyclin Dependent Kinase 1 in Human Breast Cancer Cells
Source: Biomedicines. 2023 Jan 10;11(1):172. doi: 10.3390/biomedicines11010172 (PMC9856062; doi:10.3390/biomedicines11010172)
Supplement: Supplementary file 1 [file biomedicines-11-00172-s001.zip › biomedicines-2144955-supplementary.pdf]

# **Nano-zirconium dioxide catalyzed multi-component synthesis of bioactive pyranopyrazoles that targets cyclin dependent kinase 1 in human breast cancer cells**

**Lisha K. Poonacha, Zhang Xi, Ji-Rui Yang, Omantheswara Nagaraja, Divakar V, Ananda Swamynayaka, Mahendra Madegowda, Arunachalam Chinnathambi, Sulaiman Ali Alharbi, Doddahosuru Mahadevappa Gurudatt, Vijay Pandey, NanjundaSwamy Shivananju, Kwang Seok Ahn, Gautam Sethi, Priya Babu Shubha, Peter E. Lobie, Basappa Basappa**

**Supplementary data**

# Spectral data

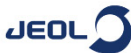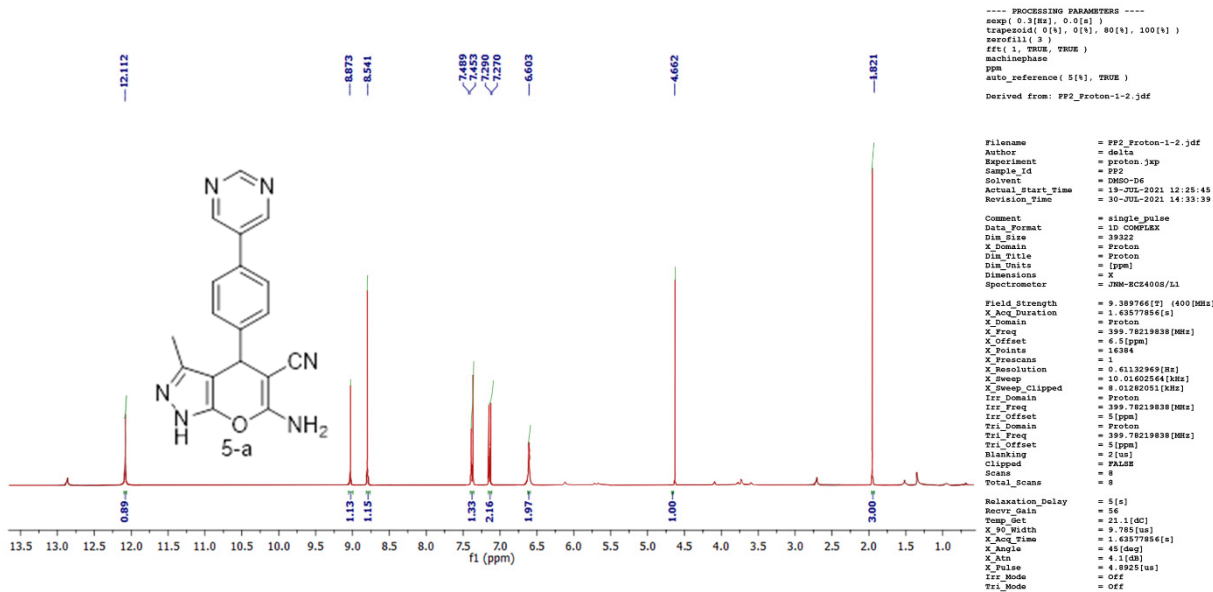

<sup>1</sup>H NMR of 5-a

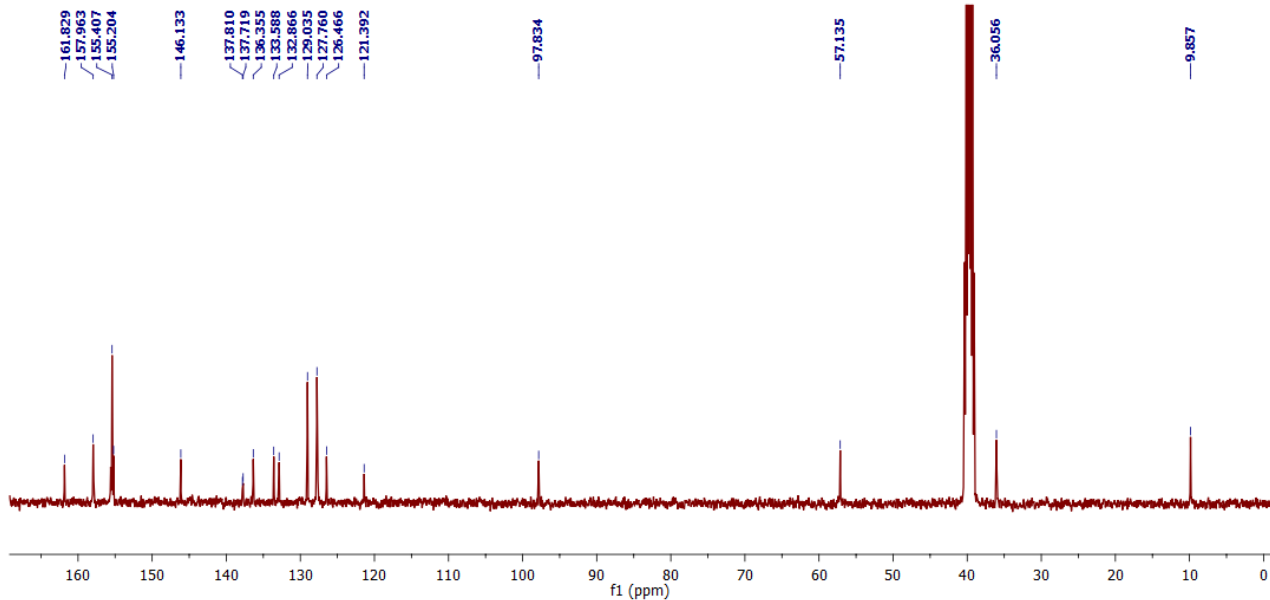

<sup>13</sup>C NMR of 5-a

2101959-PP-2 86 (2.912)

1: TOF MS ES+  
3.70e6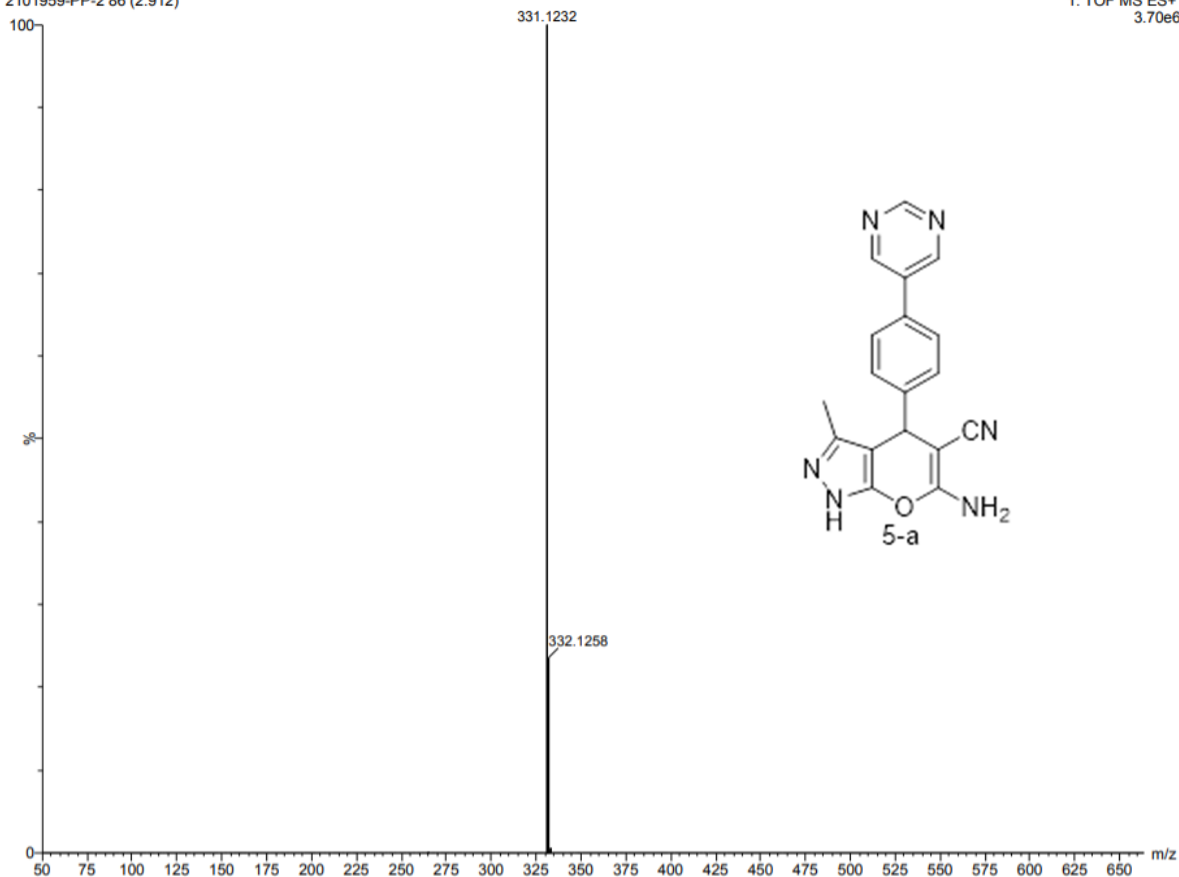

Mass spectra of 5-a

2101959-PP-2

3: Diode Array  
254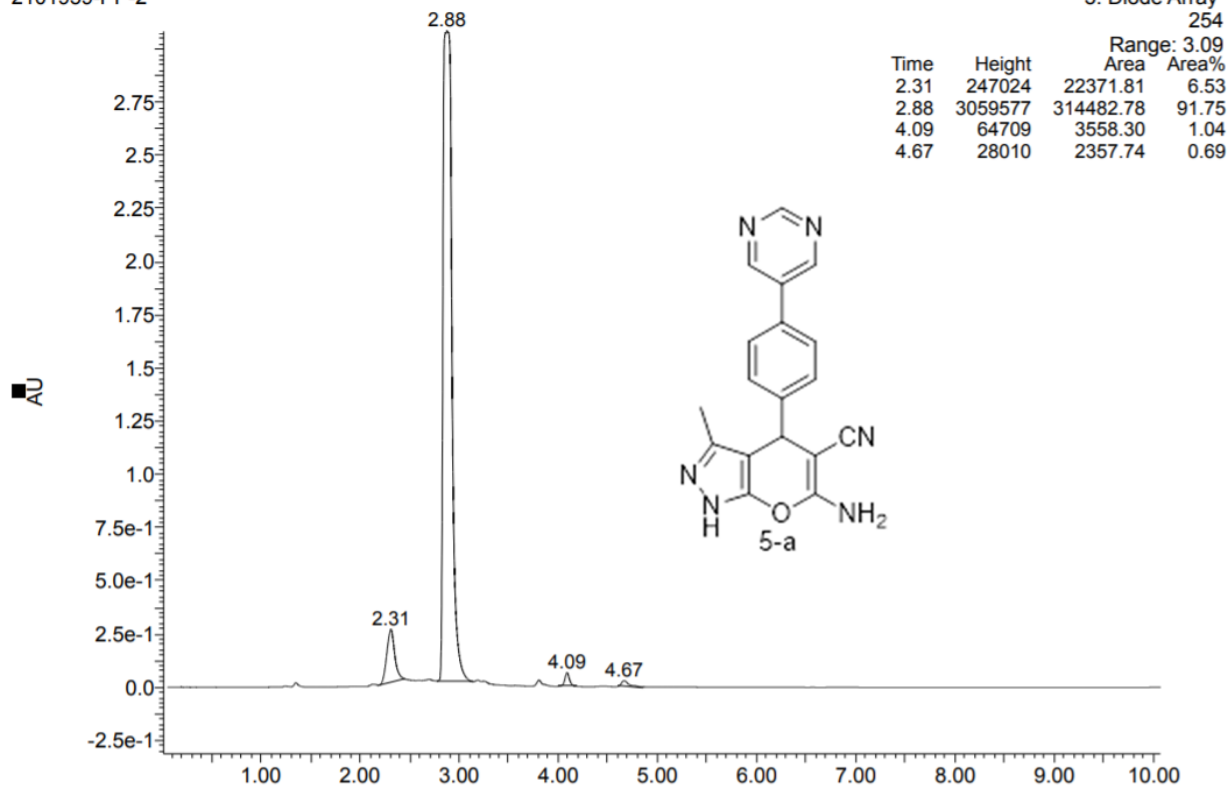

Lc of 5a

\*\*\*

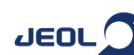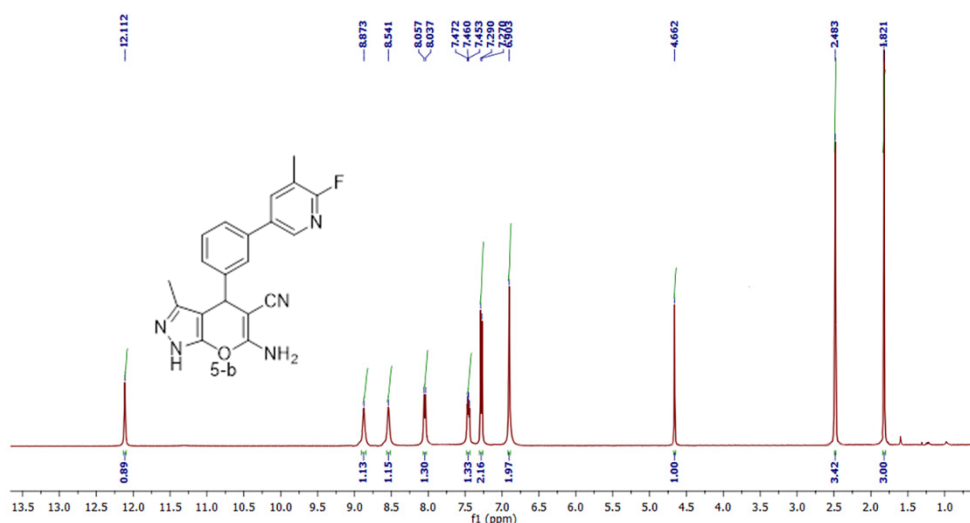

```

---- PROCESSING PARAMETERS ----
sexp( 0.3[Hz], 0.0[s] )
trapezoid( 0[%], 0[%], 80[%], 100[%] )
zerofill( 3 )
fft( 1, TRUE, TRUE )
machinphase
ppm
auto_reference( 5[%], TRUE )
Derived from: PF1_Proton-1-2.jdf

```

```

Filename      = PF1_Proton-1-2.jdf
Author        = delta
Experiment    = proton.jxp
Sample_id     = PF1
Solvent       = DMSO-D6
Actual_Start_Time = 19-JUL-2021 12:25:45
Revision_Time = 30-JUL-2021 14:33:39

Comment       = single_pulse
Data_Format   = 1D COMPLEX
Dim_Size      = 39322
X_Domain      = Proton
Dim_Title     = Proton
Dim_Units     = [ppm]
Dimensions    = X
Spectrometer  = JNM-ECX400S/L1

Field_Strength = 9.389766[T] (400[MHz])
X_Acq_Duration = 1.63577856[s]
X_Domain       = Proton
X_Freq         = 399.78219838[MHz]
X_Offset       = 6.5[ppm]
X_Points       = 16384
X_Prescans     = 1
X_Resolution   = 0.61132969[Hz]
X_Sweep        = 10.01602564[kHz]
X_Sweep_Clipped = 8.01282051[kHz]
Irr_Domain     = Proton
Irr_Freq       = 399.78219838[MHz]
Irr_Offset     = 5[ppm]
Tri_Domain     = Proton
Tri_Freq       = 399.78219838[MHz]
Tri_Offset     = 5[ppm]
Blanking       = 2[us]
Clipped        = FALSE
Scans          = 8
Total_Scans    = 8

Relaxation_Delay = 5[s]
Recvr_Gain       = 56
Temp_Set         = 21.1[degC]
X_90_Width       = 9.785[us]
X_Acq_Time       = 1.63577856[s]
X_Angle          = 45[deg]
X_Atn            = 4.1[db]
X_Pulse          = 4.8925[us]
Irr_Mode         = Off
Tri_Mode         = Off

```

<sup>1</sup>H NMR of 5b

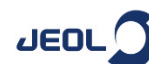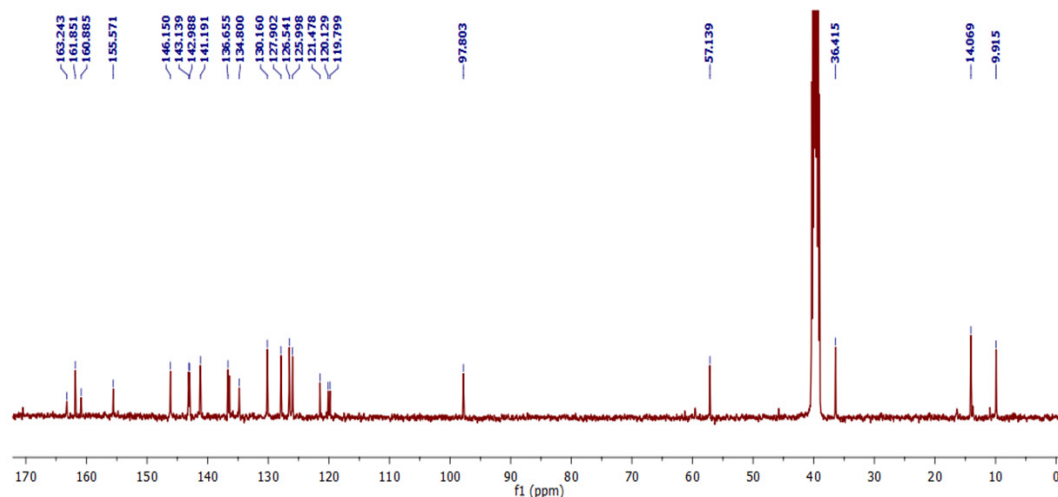

```

---- PROCESSING PARAMETERS ----
sexp( 0.3[Hz], 0.0[s] )
trapezoid( 0[%], 0[%], 80[%], 100[%] )
zerofill( 3 )
fft( 1, TRUE, TRUE )
machinphase
ppm
auto_reference( 5[%], TRUE )
Derived from: PF1c13_Proton-1-2.jdf

```

```

Filename      = PF1c13_Proton-1-2.jdf
Author        = delta
Experiment    = proton.jxp
Sample_id     = PF1c13
Solvent       = DMSO-D6
Actual_Start_Time = 19-JUL-2021 12:25:45
Revision_Time = 30-JUL-2021 14:33:39

Comment       = single_pulse
Data_Format   = 1D COMPLEX
Dim_Size      = 39322
X_Domain      = Proton
Dim_Title     = Proton
Dim_Units     = [ppm]
Dimensions    = X
Spectrometer  = JNM-ECX400S/L1

Field_Strength = 9.389766[T] (400[MHz])
X_Acq_Duration = 1.63577856[s]
X_Domain       = Proton
X_Freq         = 399.78219838[MHz]
X_Offset       = 6.5[ppm]
X_Points       = 16384
X_Prescans     = 1
X_Resolution   = 0.61132969[Hz]
X_Sweep        = 10.01602564[kHz]
X_Sweep_Clipped = 8.01282051[kHz]
Irr_Domain     = Proton
Irr_Freq       = 399.78219838[MHz]
Irr_Offset     = 5[ppm]
Tri_Domain     = Proton
Tri_Freq       = 399.78219838[MHz]
Tri_Offset     = 5[ppm]
Blanking       = 2[us]
Clipped        = FALSE
Scans          = 8
Total_Scans    = 8

Relaxation_Delay = 5[s]
Recvr_Gain       = 56
Temp_Set         = 21.1[degC]
X_90_Width       = 9.785[us]
X_Acq_Time       = 1.63577856[s]
X_Angle          = 45[deg]
X_Atn            = 4.1[db]
X_Pulse          = 4.8925[us]
Irr_Mode         = Off
Tri_Mode         = Off

```

<sup>13</sup>C NMR of 5-b

2101956-PP-1 114 (3.859)

1: TOF MS ES+  
6.93e6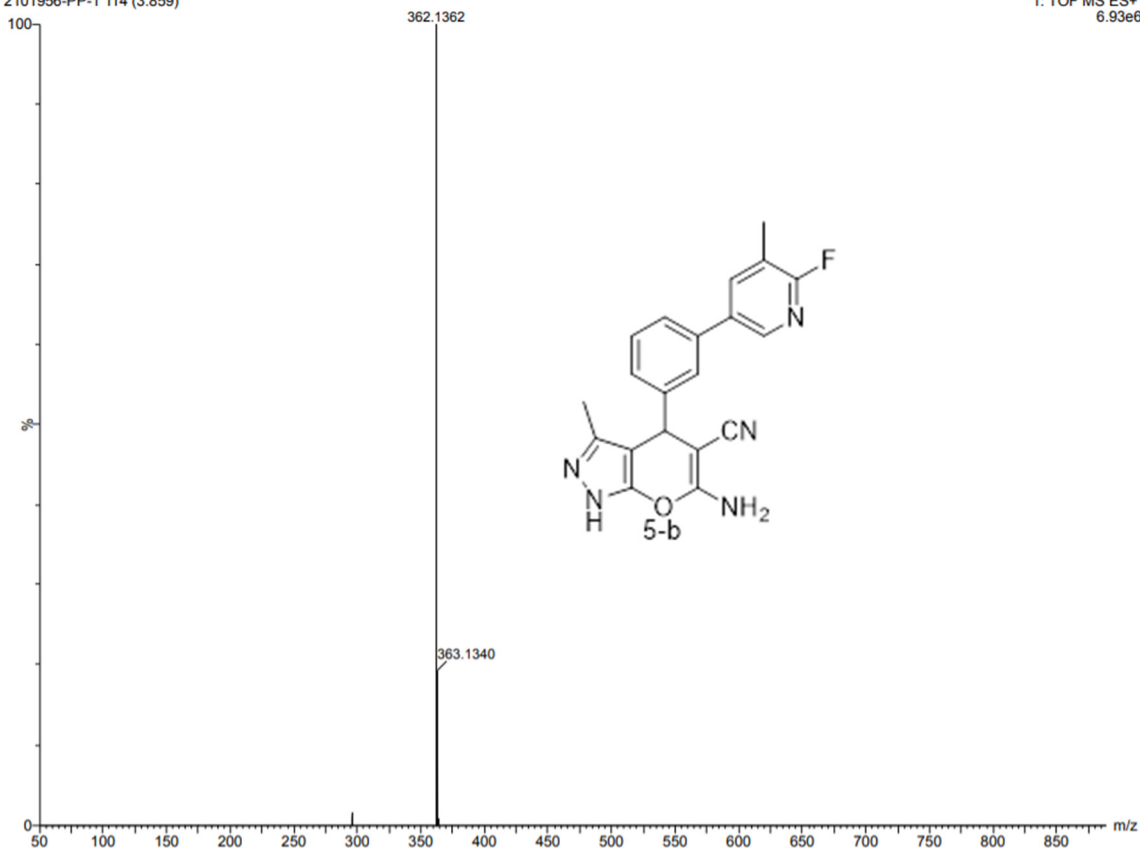

mass spectra of 5-b

2101956-PP-1

3: Diode Array  
254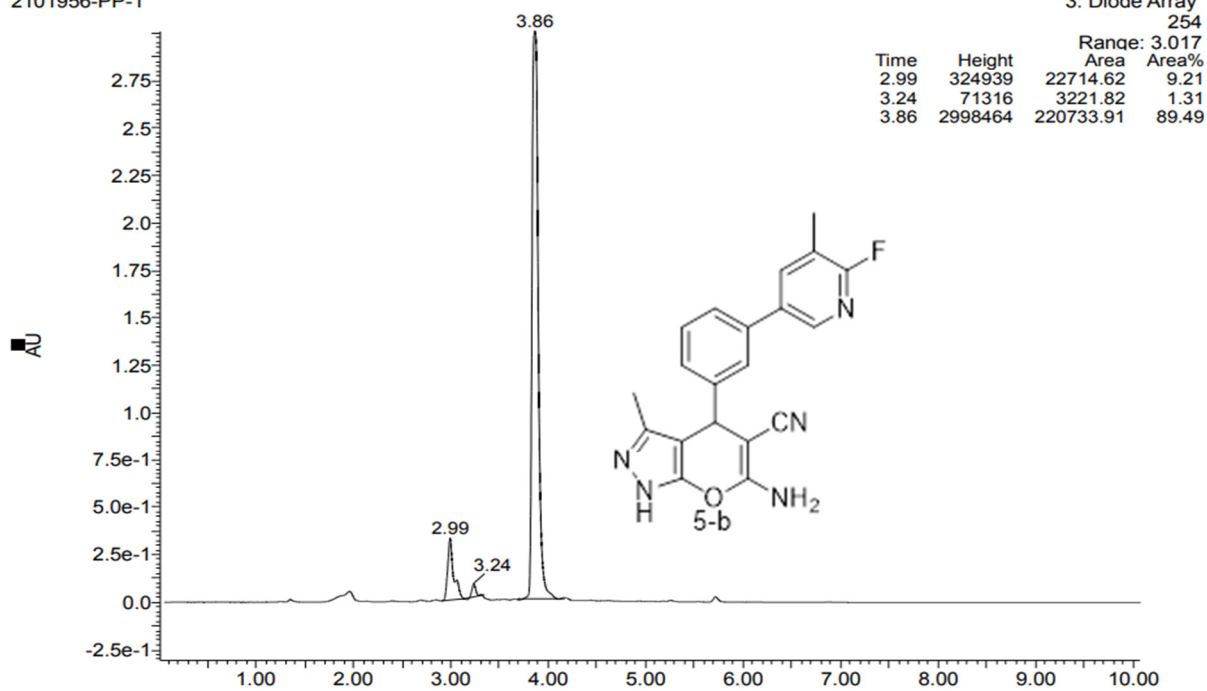

LC of 5-b

MCF-7 Log curve of 5-b

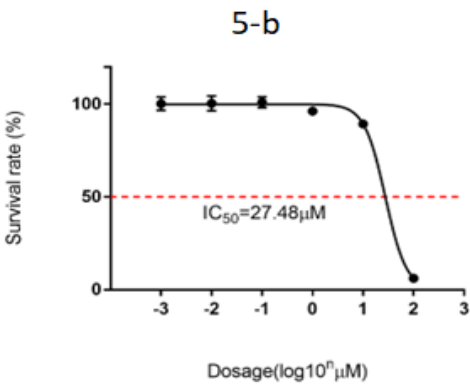

T47D log curve of 5-b

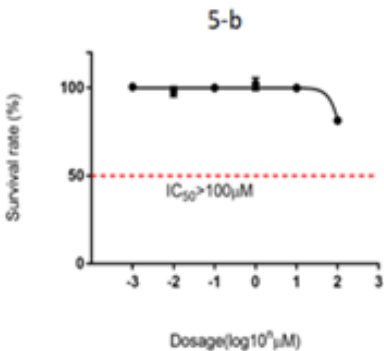

SKBR-3 log curve of 5-b

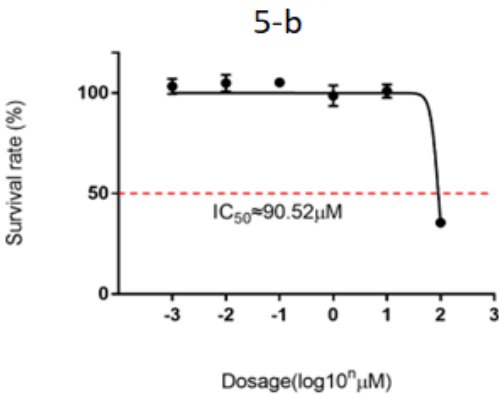

MCF-10A log curve of 5-b

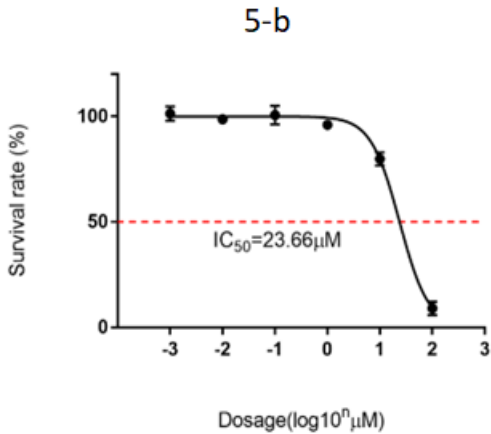

BT474 log curve of 5-b

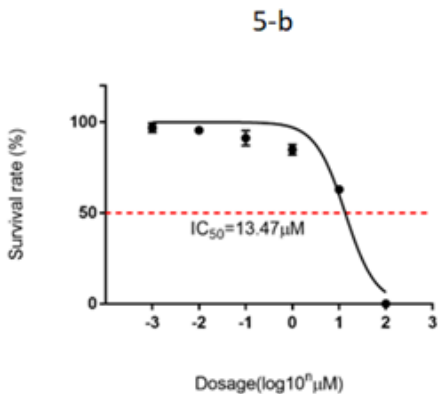

MDAMB-231 Log curve of 5-b

```

----- PROCESSING PARAMETERS -----
sexp( 0.3[Hz], 0.0[s] )
trapzoid( 0[%], 0[%], 80[%], 100[%] )
zerofill( 3 )
fft( 1, TRUE, TRUE )
machinephase
ypp
auto_reference( 5[%], TRUE )
Derived from: PF4_Proton-1-2.jdf

```

```

Filename      = PF4_Proton-1-2.jdf
Author        = delta
Experiment    = proton.jxp
Sample_Id     = PF4
Solvent       = DMSO-D6
Actual_Start_Time = 19-JUL-2021 12:25:46
Revision_Time = 30-JUL-2021 14:33:39

Comment       = single_pulse
Data_Format   = 1D COMPLEX
Dim_Size      = 39322
X_Domain      = Proton
Dim_Units     = [ppm]
Dimensions    = 1
Spectrometer  = JNM-ECX400B/L1

Field_Strength = 9.399766[T] (400[MHz])
X_Acq_Duration = 1.43577856[s]
X_Domain       = Proton
X_Freq         = 399.78219838[MHz]
X_Offset       = 6.5[ppm]
X_Points       = 16384
X_Fscans       = 1
X_Resolution   = 0.41132969[Hz]
X_Sweep        = 10.01602564[kHz]
X_Sweep_Clippped = 8.01282051[kHz]
Irr_Domain     = Proton
Irr_Freq       = 399.78219838[MHz]
Irr_Offset     = 5[ppm]
Tr1_Domain     = Proton
Tr1_Freq       = 399.78219838[MHz]
Tr1_Offset     = 5[ppm]
Blanking       = 2[us]
Clipped        = PALSS
Scans          = 8
Total_Scans    = 8

Relaxation_Delay = 5[s]
Recvr_Gain       = 56
Temp_Set        = 21.1[°C]
X_90_Width      = 9.785[us]
X_Acq_Time      = 1.43577856[s]
X_Angle         = 45[deg]
X_Attn          = 4.1[db]
X_Pulse         = 4.8925[us]
Irr_Mode        = Off
Tr1_Mode        = Off

```

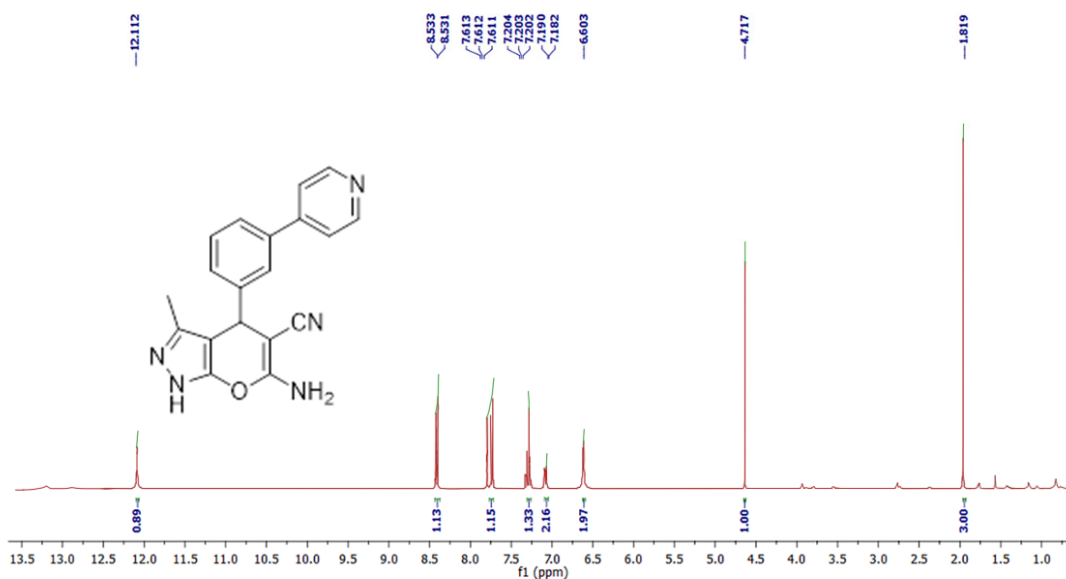

<sup>1</sup>H NMR of 5-c

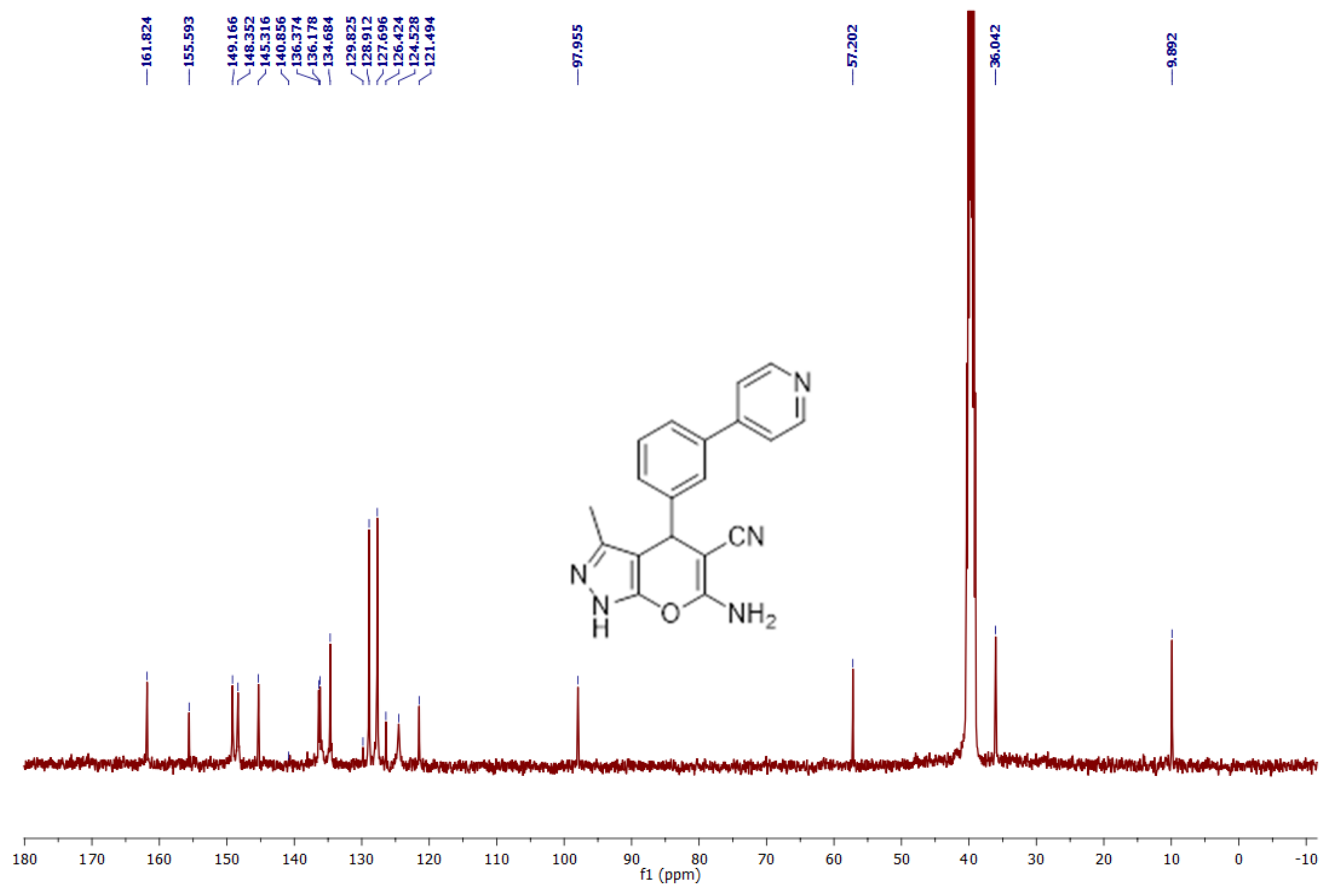

<sup>13</sup>C NMR of 5-c

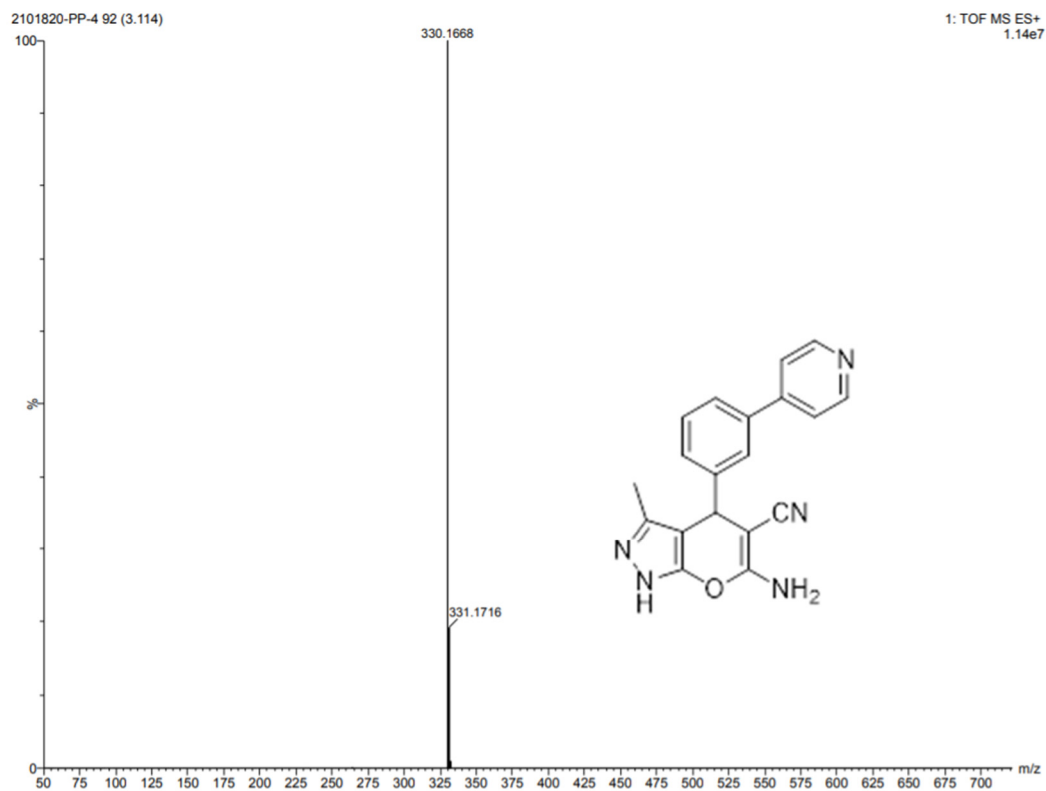

mass spectra of 5-c

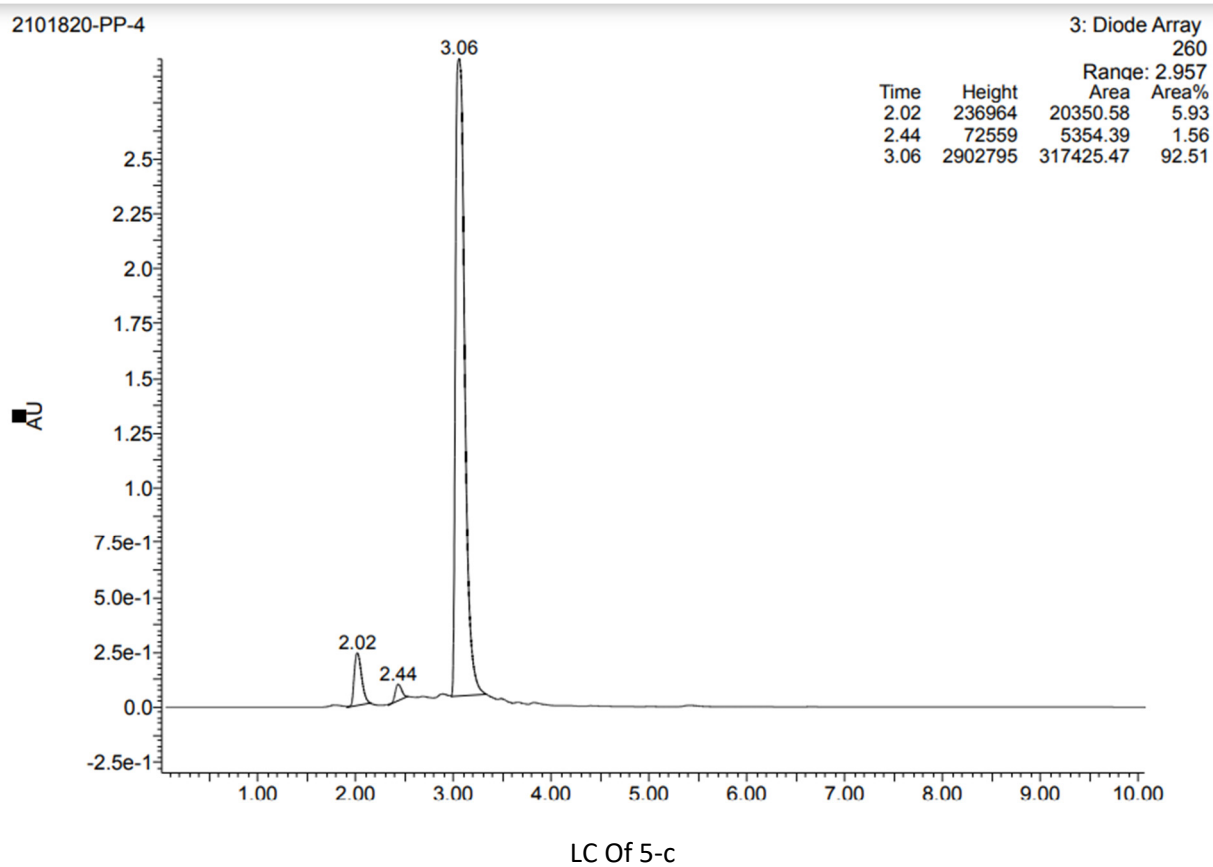

MCF-7 log curve of 5-c

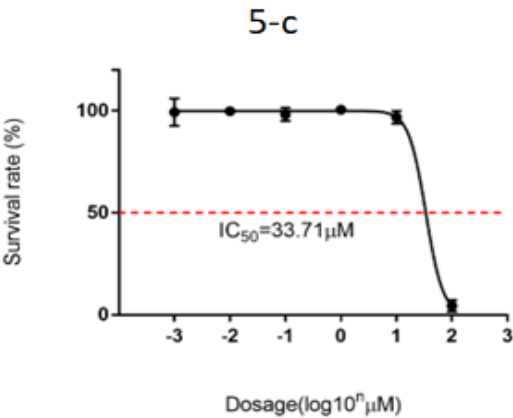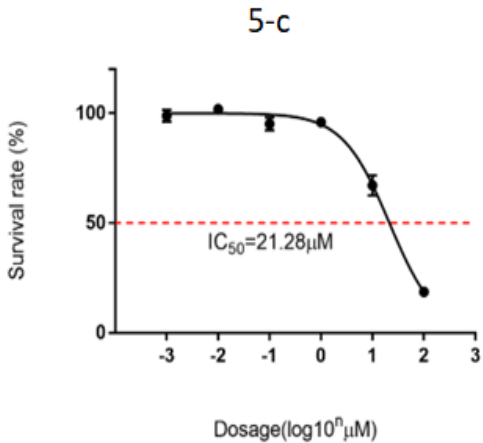

T47D log curve of 5c

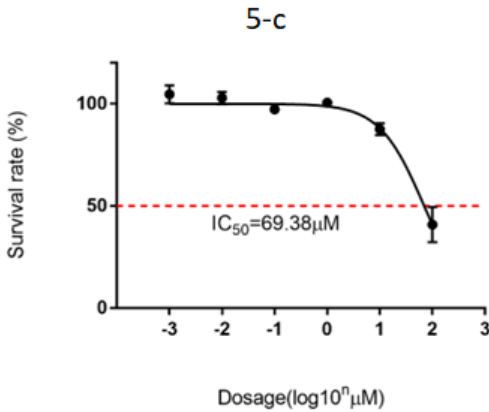

BT474 log curve of 5c

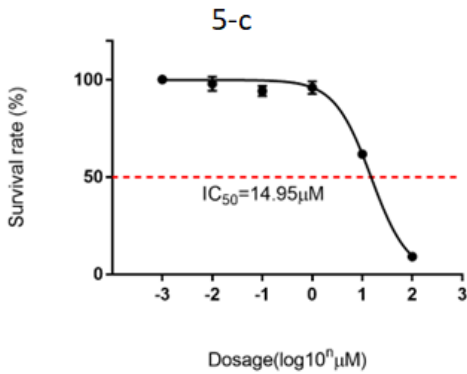

SKBR-3 log curve of 5-c

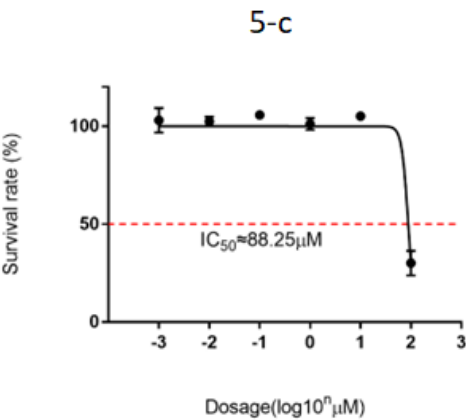

MDAMB-231 log curve of 5-c

MCF-10A log curve of 5-c

-----

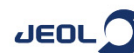

----- PROCESSING PARAMETERS -----  
sexp( 0.3181, 0.018 )  
trapezoid( 0%, 0%, 80%, 100% )  
zerofill( 3 )  
fft( 1, TRUE, TRUE )  
machinphase  
gpc  
auto\_reference( 5%, TRUE )  
Derived from: PF6\_Proton-1-2.jdf

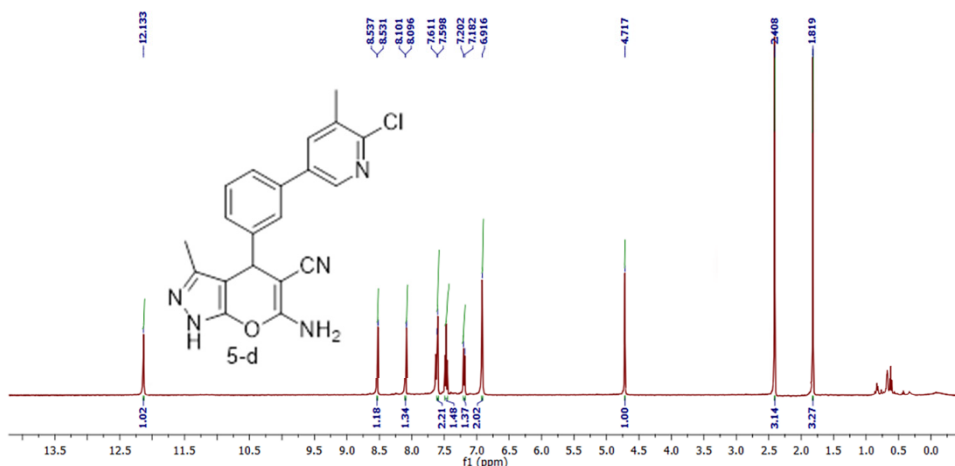

<sup>1</sup>H NMR of 5-d

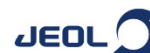

----- PROCESSING PARAMETERS -----  
sexp( 0.3181, 0.018 )  
trapezoid( 0%, 0%, 80%, 100% )  
zerofill( 3 )  
fft( 1, TRUE, TRUE )  
machinphase  
gpc  
auto\_reference( 5%, TRUE )  
Derived from: PF6Expanded\_Proton-1-2.jdf

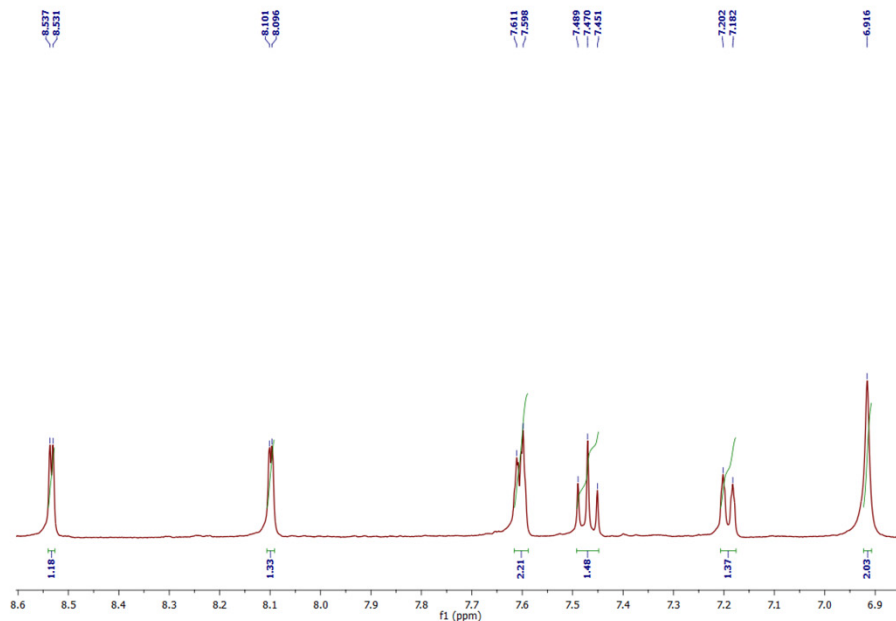

Expanded H NMR of 5d

Filename = PF6Expanded\_Proton-1-2.jdf  
Author = delta  
Experiment = proton.jxp  
Sample\_Id = PF6Expanded  
Solvent = DMSO-d6  
Actual\_Start\_Time = 19-JUL-2021 12:25:45  
Revision\_Time = 30-JUL-2021 14:33:39  
Comment = single\_pulse  
Data\_Format = ID COMPLEX  
Dia\_Size = 39322  
X\_Domain = Proton  
Dia\_Title = Proton  
Dia\_Units = [ppm]  
Dimensions = X  
Spectrometer = JNM-ECZ400S/L1  
Field\_Strength = 9.389766[T] (400[Mhz])  
X\_Acq\_Duration = 1.63577856[s]  
X\_Domain = Proton  
X\_Freq = 399.78219838[Mhz]  
X\_Offset = 6.5[ppm]  
X\_Points = 16384  
X\_Prescans = 1  
X\_Resolution = 0.61132969[Hz]  
X\_Sweep = 10.01602564[Hz]  
X\_Sweep\_Clipped = 8.01282051[kHz]  
Irr\_Domain = Proton  
Irr\_Freq = 399.78219838[Mhz]  
Irr\_Offset = 5[ppm]  
Tri\_Domain = Proton  
Tri\_Freq = 399.78219838[Mhz]  
Tri\_Offset = 5[ppm]  
Blanking = 2[us]  
Clipped = FALSE  
Scans = 8  
Total\_Scans = 8  
Relaxation\_Delay = 5[s]  
Recvr\_Gain = 56  
Temp\_Set = 21.1[deg]  
X\_90\_Width = 9.785[us]  
X\_Acq\_Time = 1.63577856[s]  
X\_Angle = 45[deg]  
X\_Atn = 4.1[db]  
X\_Pulse = 4.8925[us]  
Irr\_Mode = Off  
Tri\_Mode = Off

```

---- PROCESSING PARAMETERS ----
sexp( 0.3[Hz], 0.0[s] )
trapezoid( 0[%], 0[%], 80[%], 100[%] )
zerofill( 3 )
fft( 1, TRUE, TRUE )
machinphase
ppm
auto_reference( 5[%], TRUE )
Derived from: PF6 c13_Proton-1-2.jdf

```

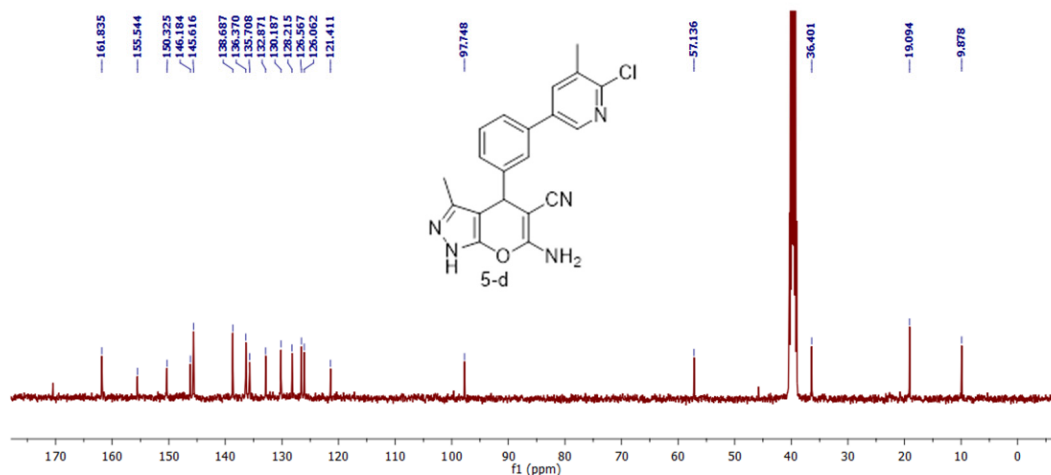

```

Filename      = PF6 c13_Proton-1-2.jdf
Author        = delta
Experiment    = proton_jxp
Sample_Id     = PF6 c13
Solvent       = DMSO-D6
Actual_Start_Time = 19-JUL-2021 12:25:45
Revision_Time  = 30-JUL-2021 14:33:39

Comment       = single pulse
Data_Format   = 1D COMPLEX
Dim_Size      = 39322
X_Domain      = Proton
Dim_Title     = Proton
Dim_Units     = [ppm]
Dimensions    = 2
Spectrometer  = JNM-ECX400S/L1

Field_Strength = 9.389766[T] (400[MHz])
X_Acq_Duration = 1.63577856[s]
X_Domain       = Proton
X_Freq         = 399.78219838[MHz]
X_Offset       = 6.5[ppm]
X_Points       = 16384
X_Prescans     = 1
X_Resolution   = 0.61132969[Hz]
X_Sweep        = 10.01602564[MHz]
X_Sweep_Clippped = 8.01282051[MHz]
Irr_Domain     = Proton
Irr_Freq       = 399.78219838[MHz]
Irr_Offset     = 5[ppm]
Tri_Domain     = Proton
Tri_Freq       = 399.78219838[MHz]
Tri_Offset     = 5[ppm]
Blanking       = 2[us]
Clipped        = FALSE
Scans          = 8
Total_Scans    = 8

Relaxation_Delay = 5[s]
Recpr_Gain       = 56
Temp_Get         = 21.1[degC]
X_90_Width       = 9.785[us]
X_Acq_Time       = 1.63577856[s]
X_Angle          = 45[deg]
X_Atn            = 4.1[dB]
X_Pulse          = 4.8825[us]
Irr_Mode         = Off
Tri_Mode         = Off

```

<sup>13</sup>C NMR of 5-d

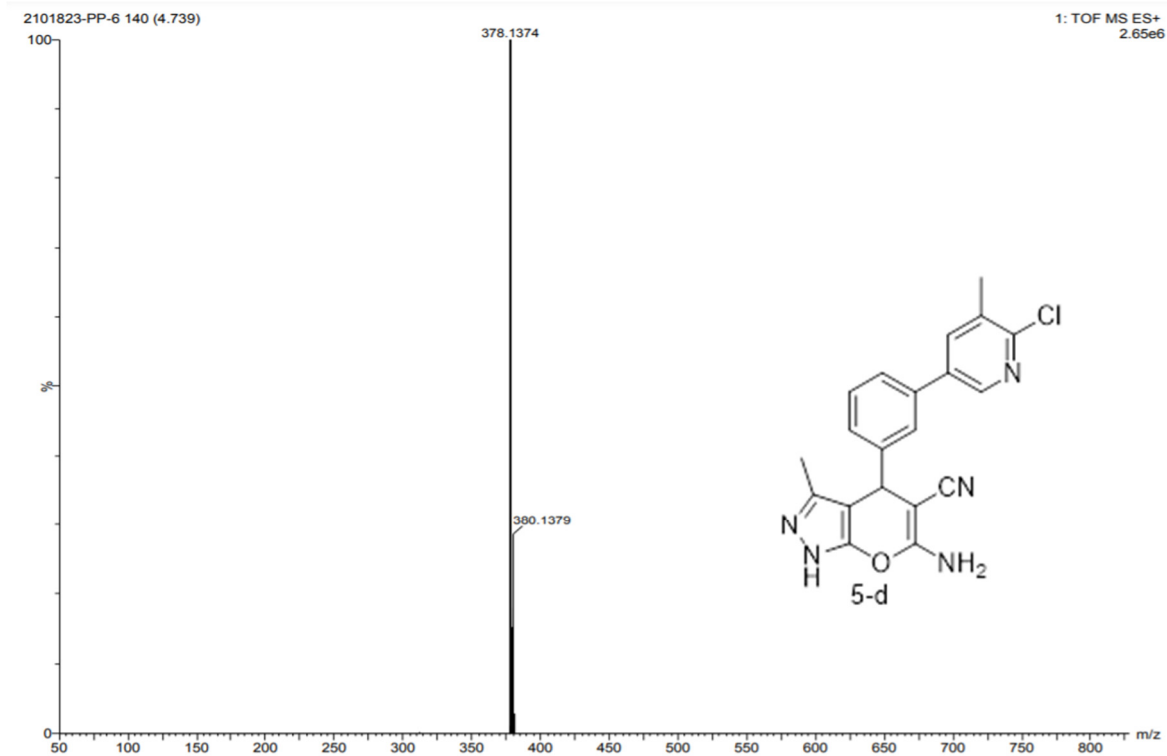

mass spectra of 5-d

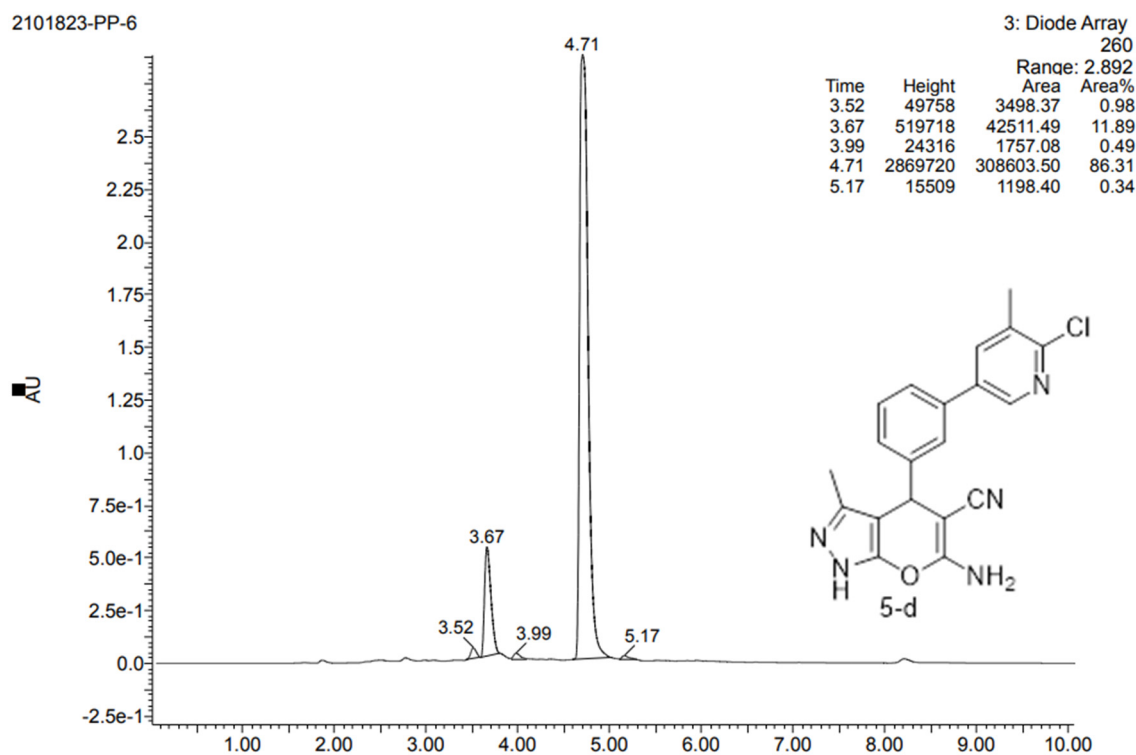

LC of 5d

\*\*\*

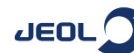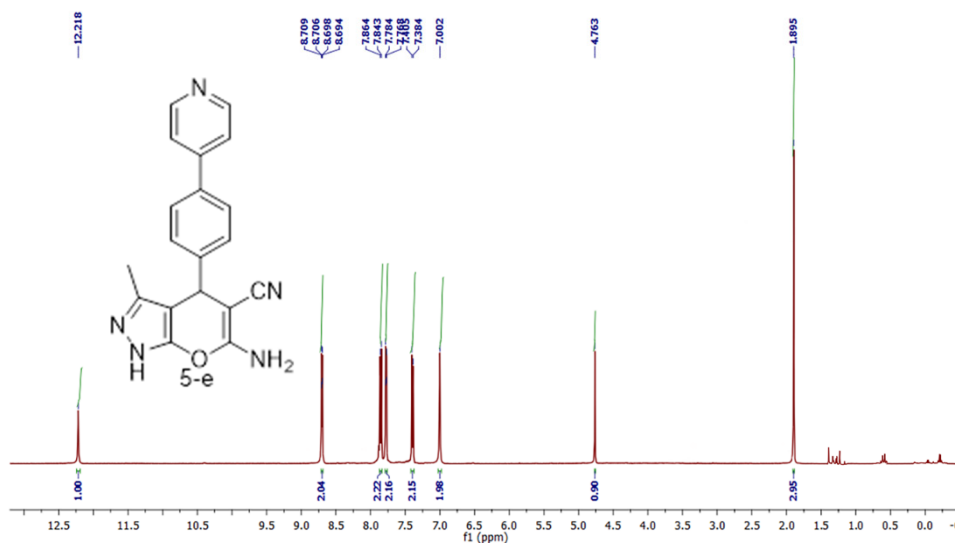

<sup>1</sup>H NMR of 5-e

----- PROCESSING PARAMETERS -----  
sweep( 0.31Hz, 0.01s )  
trapezoid( 0[%], 0[%], 80[%], 100[%] )  
zerofill( 3 )  
fft( 1, TRUE, TRUE )  
machinephase  
ppm  
auto\_reference( 5[%], TRUE )  
Derived from: PF7\_Protom-1-2.jdf

Filename = PF7\_Protom-1-2.jdf  
Author = delta  
Experiment = proton.jxp  
Sample\_Id = PF7  
Solvent = DMSO-d6  
Actual\_Start\_Time = 19-JUL-2021 12:25:45  
Revision\_Time = 30-JUL-2021 14:33:39  
Comment = single pulse  
Data\_Format = 1D COMPLEX  
Dim\_Size = 39322  
X\_Domain = Proton  
Dim\_Title = Proton  
Dim\_Units = [ppm]  
Dimensions = X  
Spectrometer = JNM-EC400S/L1  
Field\_Strength = 9.39766[T] (400[MHz])  
X\_Acq\_Duration = 1.63577856[s]  
X\_Domain = Proton  
X\_Freq = 399.78219838[MHz]  
X\_Offset = 6.5[ppm]  
X\_Points = 16384  
X\_Fscans = 1  
X\_Resolution = 0.61132969[Hz]  
X\_Sweep = 10.01602564[Hz]  
X\_Sweep\_Clipped = 8.01262051[Hz]  
Irr\_Domain = Proton  
Irr\_Freq = 399.78219838[MHz]  
Irr\_Offset = 5[ppm]  
Tri\_Domain = Proton  
Tri\_Freq = 399.78219838[MHz]  
Tri\_Offset = 5[ppm]  
Blanking = 2[us]  
Clipped = FALSE  
Scans = 8  
Total\_Scans = 8  
Relaxation\_Delay = 5[s]  
Recvr\_Gain = 56  
Temp\_Get = 21.1[deg]  
X\_R0\_Width = 9.785[us]  
X\_Acq\_Time = 1.63577856[s]  
X\_Angle = 45[deg]  
X\_Atn = 4.1[dB]  
X\_Pulse = 4.8925[us]  
Irr\_Mode = Off  
Tri\_Mode = Off

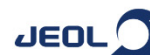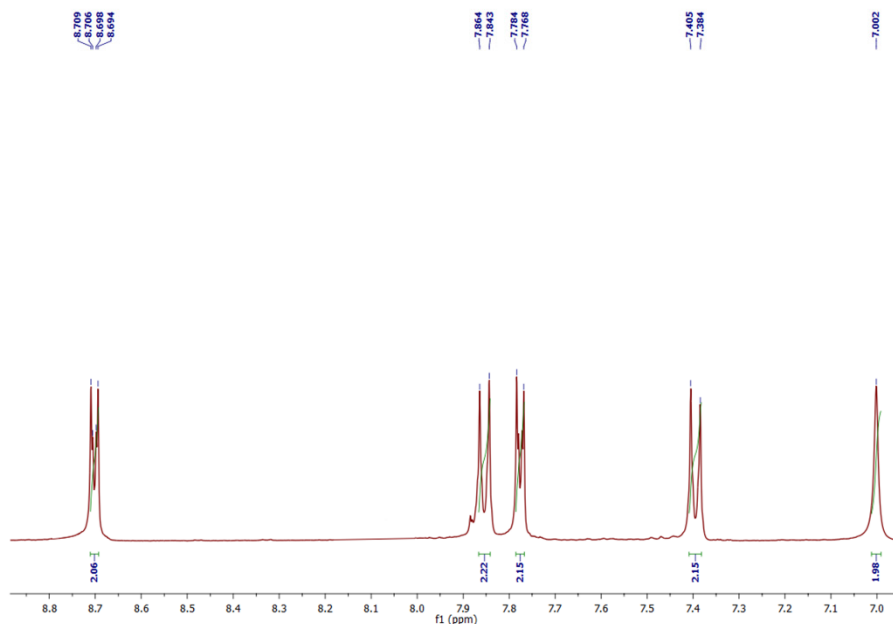

----- PROCESSING PARAMETERS -----  
sweep( 0.31Hz, 0.01s )  
trapezoid( 0[%], 0[%], 80[%], 100[%] )  
zerofill( 3 )  
fft( 1, TRUE, TRUE )  
machinephase  
ppm  
auto\_reference( 5[%], TRUE )  
Derived from: PF7Expanded\_Protom-1-2.jdf

Filename = PF7Expanded\_Protom-1-2.jdf  
Author = delta  
Experiment = proton.jxp  
Sample\_Id = PF7Expanded  
Solvent = DMSO-d6  
Actual\_Start\_Time = 19-JUL-2021 12:25:45  
Revision\_Time = 30-JUL-2021 14:33:39  
Comment = single pulse  
Data\_Format = 1D COMPLEX  
Dim\_Size = 39322  
X\_Domain = Proton  
Dim\_Title = Proton  
Dim\_Units = [ppm]  
Dimensions = X  
Spectrometer = JNM-EC400S/L1  
Field\_Strength = 9.39766[T] (400[MHz])  
X\_Acq\_Duration = 1.63577856[s]  
X\_Domain = Proton  
X\_Freq = 399.78219838[MHz]  
X\_Offset = 6.5[ppm]  
X\_Points = 16384  
X\_Fscans = 1  
X\_Resolution = 0.61132969[Hz]  
X\_Sweep = 10.01602564[Hz]  
X\_Sweep\_Clipped = 8.01262051[Hz]  
Irr\_Domain = Proton  
Irr\_Freq = 399.78219838[MHz]  
Irr\_Offset = 5[ppm]  
Tri\_Domain = Proton  
Tri\_Freq = 399.78219838[MHz]  
Tri\_Offset = 5[ppm]  
Blanking = 2[us]  
Clipped = FALSE  
Scans = 8  
Total\_Scans = 8  
Relaxation\_Delay = 5[s]  
Recvr\_Gain = 56  
Temp\_Get = 21.1[deg]  
X\_R0\_Width = 9.785[us]  
X\_Acq\_Time = 1.63577856[s]  
X\_Angle = 45[deg]  
X\_Atn = 4.1[dB]  
X\_Pulse = 4.8925[us]  
Irr\_Mode = Off  
Tri\_Mode = Off

Expanded H NMR of 5e

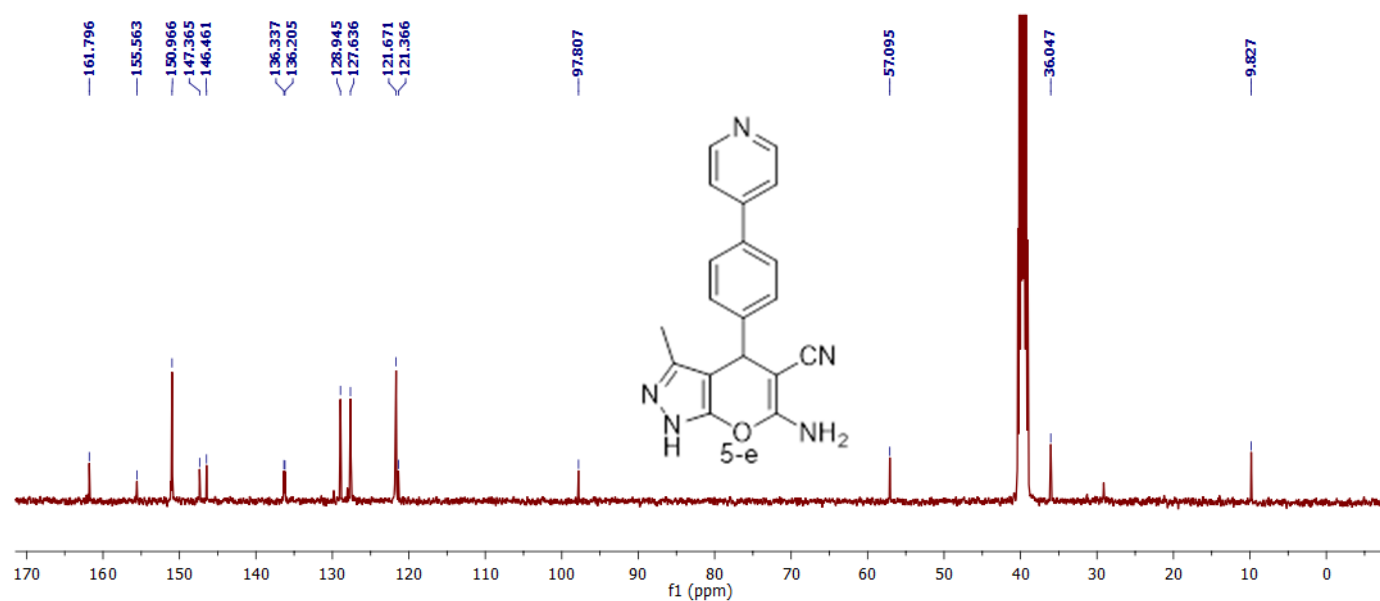

<sup>13</sup>C NMR of 5-e

2101822-PP-7 85 (2.878)

1: TOF MS ES+  
1.07e7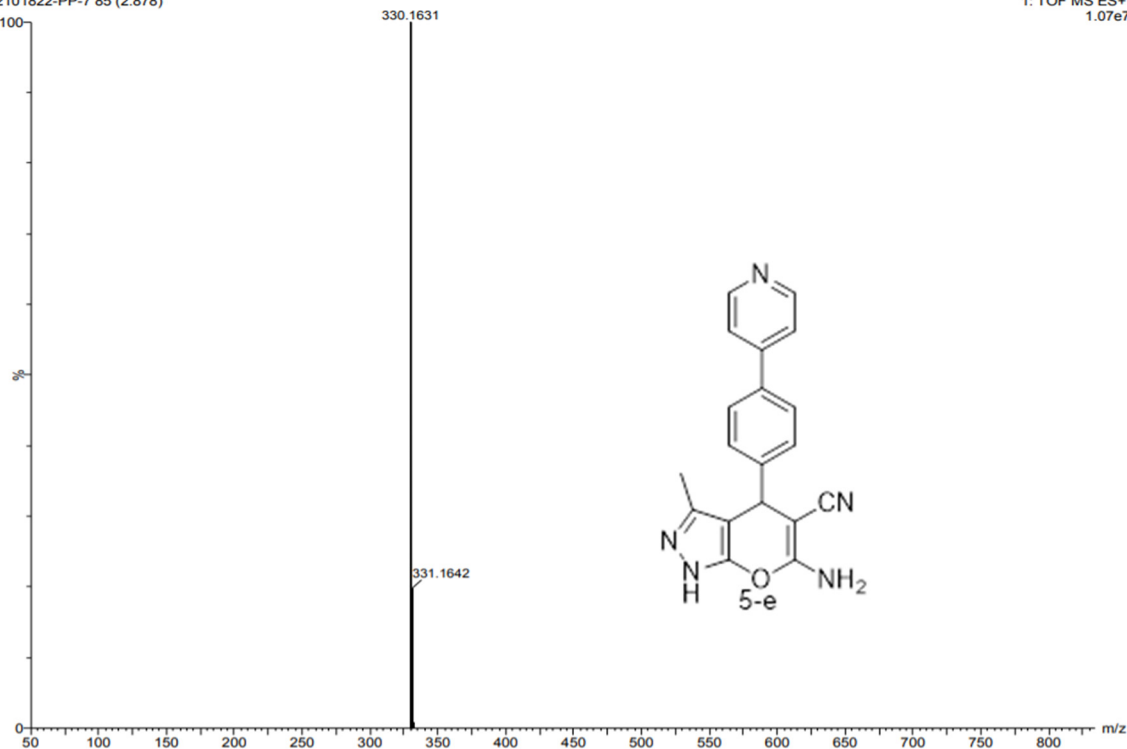

mass spectra of 5-e

2101822-PP-7

3: Diode Array  
300

Range: 2.831

| Time | Height  | Area      | Area% |
|------|---------|-----------|-------|
| 2.66 | 46043   | 3242.61   | 1.02  |
| 2.82 | 2754649 | 284694.59 | 89.35 |
| 3.80 | 271528  | 30705.66  | 9.64  |

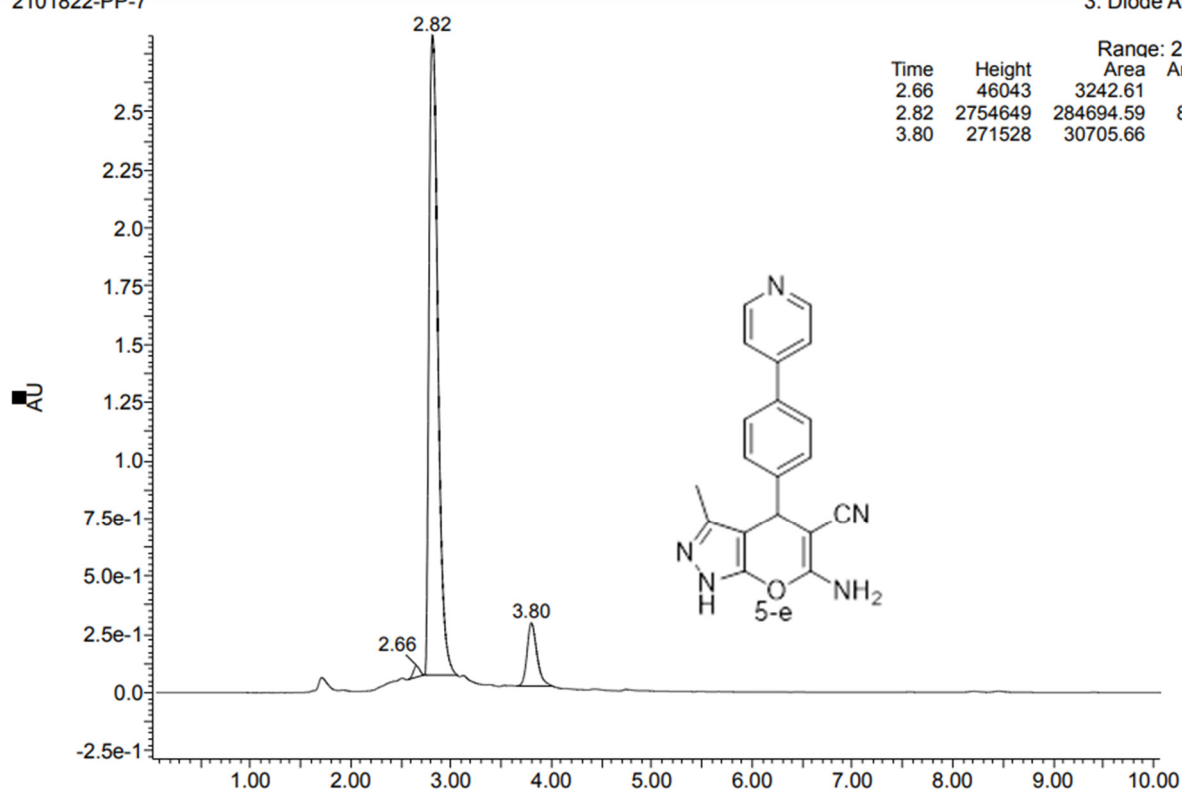

LC of 5-e

MCF-7 log curve of 5-e

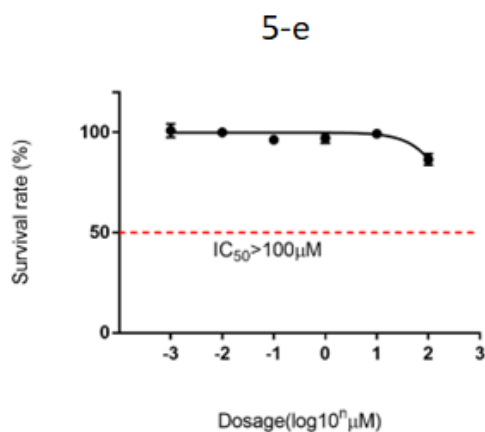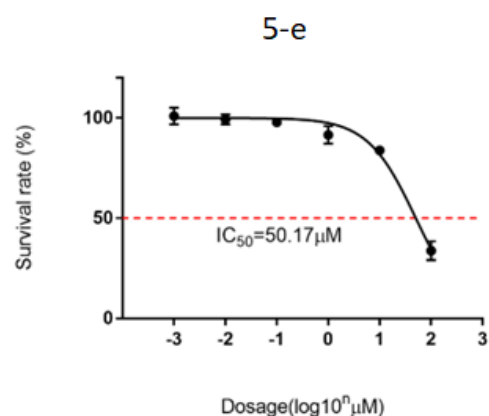

T47D log curve of 5-e

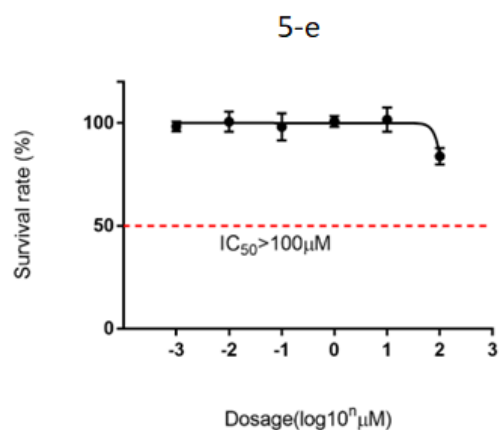

BT474 log curve of 5-e

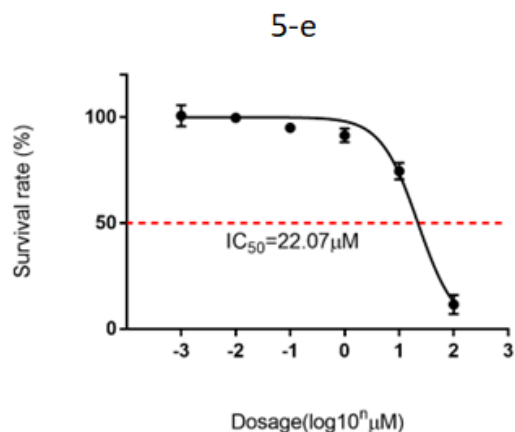

SKBR-3 log curve of 5-e

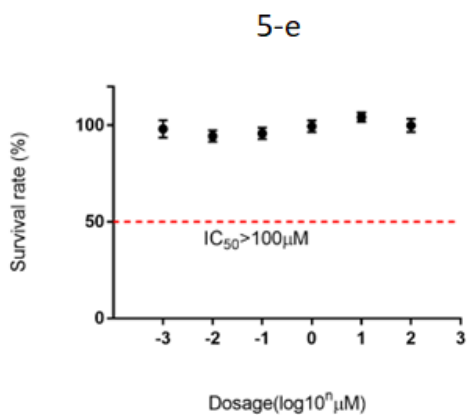

MDAMB-231 log curve of 5-e

MCF-10A log curve of 5-e

-----

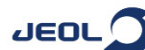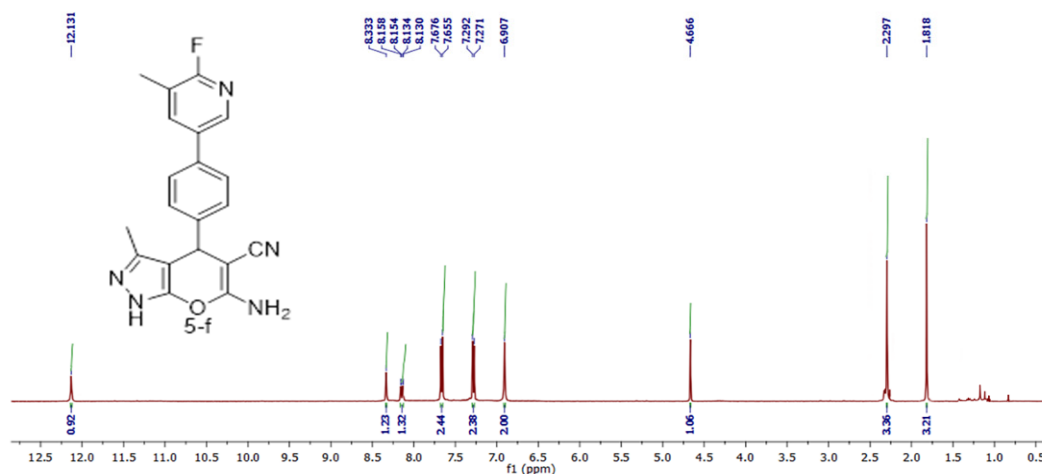

<sup>1</sup>H NMR of 5-f

```
----- PROCESSING PARAMETERS -----
sexp( 0.3[Hz], 0.0[s] )
trapezoid( 0[%], 0[%], 80[%], 100[%] )
zerofill( 3 )
fft( 1, TRUE, TRUE )
machinphase
ppm
auto_reference( 5[%], TRUE )
Derived from: PF8_Proton-1-2.jdf
```

```
Filename      = PF8_Proton-1-2.jdf
Author       = delta
Experiment   = proton.jxp
Sample_id    = PF8
Solvent      = DMSO-D6
Actual_Start_Time = 19-JUL-2021 12:25:45
Revision_Time = 30-JUL-2021 14:33:39

Comment      = single_pulse
Data_Format  = 1D COMPLEX
Dim_Size     = 39322
Dim_Domain   = Proton
Dim_Title    = Proton
Dim_Units    = [ppm]
Dimensions   = X
Spectrometer = JNM-ECZ400S/L1

Field_Strength = 9.389766[T] (400[MHz])
X_Acq_Duration = 1.63577856[s]
X_Domain       = Proton
X_Freq         = 399.78219838[MHz]
X_Offset       = 6.5[ppm]
X_Points       = 16384
X_Frescans     = 1
X_Resolution   = 0.6132969[Hz]
X_Sweep        = 10.01602564[kHz]
X_Sweep_Clipped = 8.01262051[kHz]
Irr_Domain     = Proton
Irr_Freq       = 399.78219838[MHz]
Irr_Offset     = 5[ppm]
Tri_Domain     = Proton
Tri_Freq       = 399.78219838[MHz]
Tri_Offset     = 5[ppm]
Blanking       = 2[us]
Clipped        = FALSE
Scans          = 8
Total_Scans    = 8

Relaxation_Delay = 5[s]
Recvr_Gain       = 56
Temp_Get         = 21.1[degC]
X_90_Width       = 9.785[us]
X_Acq_Time       = 1.63577856[s]
X_Angle          = 45[deg]
X_Atn            = 4.1[dB]
X_Pulse          = 4.8925[us]
Irr_Mode         = Off
Tri_Mode         = Off
```

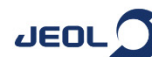

```
----- PROCESSING PARAMETERS -----
sexp( 0.3[Hz], 0.0[s] )
trapezoid( 0[%], 0[%], 80[%], 100[%] )
zerofill( 3 )
fft( 1, TRUE, TRUE )
machinphase
ppm
auto_reference( 5[%], TRUE )
Derived from: PF8_Expanded_Proton-1-2.jdf
```

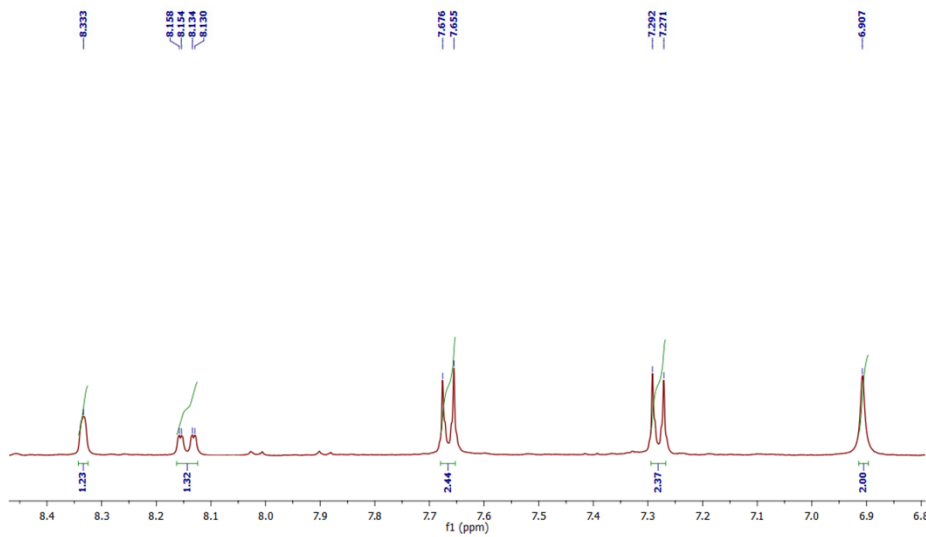

Expanded spectra of 5-f

```
Filename      = PF8_Expanded_Proton-1-2.jdf
Author       = delta
Experiment   = proton.jxp
Sample_id    = PF8_Expanded
Solvent      = DMSO-D6
Actual_Start_Time = 19-JUL-2021 12:25:45
Revision_Time = 30-JUL-2021 14:33:39

Comment      = single_pulse
Data_Format  = 1D COMPLEX
Dim_Size     = 39322
Dim_Domain   = Proton
Dim_Title    = Proton
Dim_Units    = [ppm]
Dimensions   = X
Spectrometer = JNM-ECZ400S/L1

Field_Strength = 9.389766[T] (400[MHz])
X_Acq_Duration = 1.63577856[s]
X_Domain       = Proton
X_Freq         = 399.78219838[MHz]
X_Offset       = 6.5[ppm]
X_Points       = 16384
X_Frescans     = 1
X_Resolution   = 0.6132969[Hz]
X_Sweep        = 10.01602564[kHz]
X_Sweep_Clipped = 8.01262051[kHz]
Irr_Domain     = Proton
Irr_Freq       = 399.78219838[MHz]
Irr_Offset     = 5[ppm]
Tri_Domain     = Proton
Tri_Freq       = 399.78219838[MHz]
Tri_Offset     = 5[ppm]
Blanking       = 2[us]
Clipped        = FALSE
Scans          = 8
Total_Scans    = 8

Relaxation_Delay = 5[s]
Recvr_Gain       = 56
Temp_Get         = 21.1[degC]
X_90_Width       = 9.785[us]
X_Acq_Time       = 1.63577856[s]
X_Angle          = 45[deg]
X_Atn            = 4.1[dB]
X_Pulse          = 4.8925[us]
Irr_Mode         = Off
Tri_Mode         = Off
```

```

----- PROCESSING PARAMETERS -----
smap( 0.318s, 0.01s )
trapezoid( 0%, 0%, 0%, 100% )
herschell( 3 )
fft( 1, TRUE, TRUE )
machinphase
hgm
auto_reference( 5%, TRUE )
Derived from: PP8 c13_Proton-1-2.jdf

```

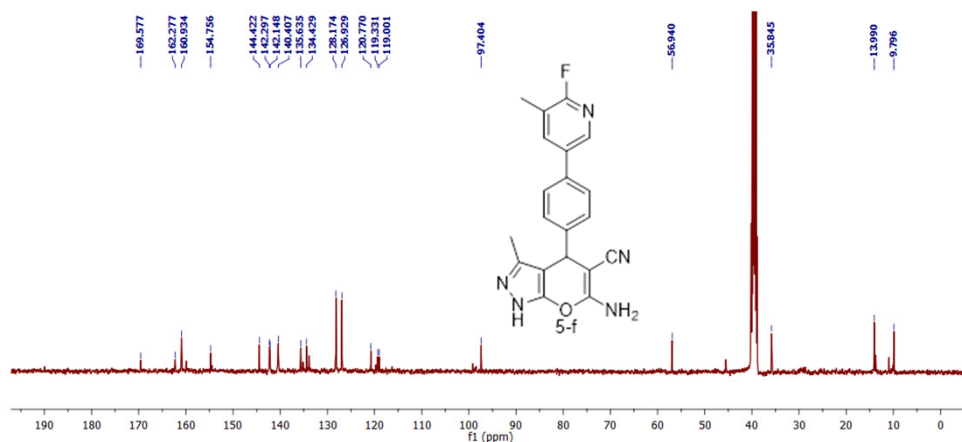

```

Filename      = PP8 c13_Proton-1-2.jdf
Author        = delta
Experiment    = proton_jap
Sample_id     = PP8 c13
Solvent       = DMSO-d6
Actual_start_time = 19-JUL-2021 12:25:45
Revision_time = 30-JUL-2021 14:33:39

Comment       = single pulse
Data_format   = 1D COMETAX
Dia_size      = 39322
X_domain      = Proton
Dia_title     = Proton
Dia_units     = [ppm]
Dimensions    = 2
Spectrometer  = JNM-ECZ400S/L1

Field_strength = 9.399766[T] (400[MHz])
X_acq_duration = 1.63577856[s]
X_domain       = Proton
X_freq         = 399.78219838[MHz]
X_offset       = 6.5[ppm]
X_points       = 14384
X_fscans       = 1
X_resolution   = 0.61329669[Hz]
X_sweep        = 10.01602564[kHz]
X_sweep_clipped = 9.0182051[MHz]
Irr_domain     = Proton
Irr_freq       = 399.78219838[MHz]
Irr_offset     = 5[ppm]
Tri_domain     = Proton
Tri_freq       = 399.78219838[MHz]
Tri_offset     = 5[ppm]
Blanking       = 2[us]
Clipped        = FALSE
Scales         = 8
Total_scans    = 8

Relaxation_delay = 5[s]
Recvr_gain       = 56
Comp_gain       = 22.1[db]
X_90_width      = 9.785[us]
X_acq_time      = 1.63577856[s]
X_angle         = 45[deg]
X_atn           = 4.1[db]
X_pulse         = 4.0925[us]
Irr_mode        = Off
Tri_mode        = Off

```

<sup>13</sup>C NMR of 5-f

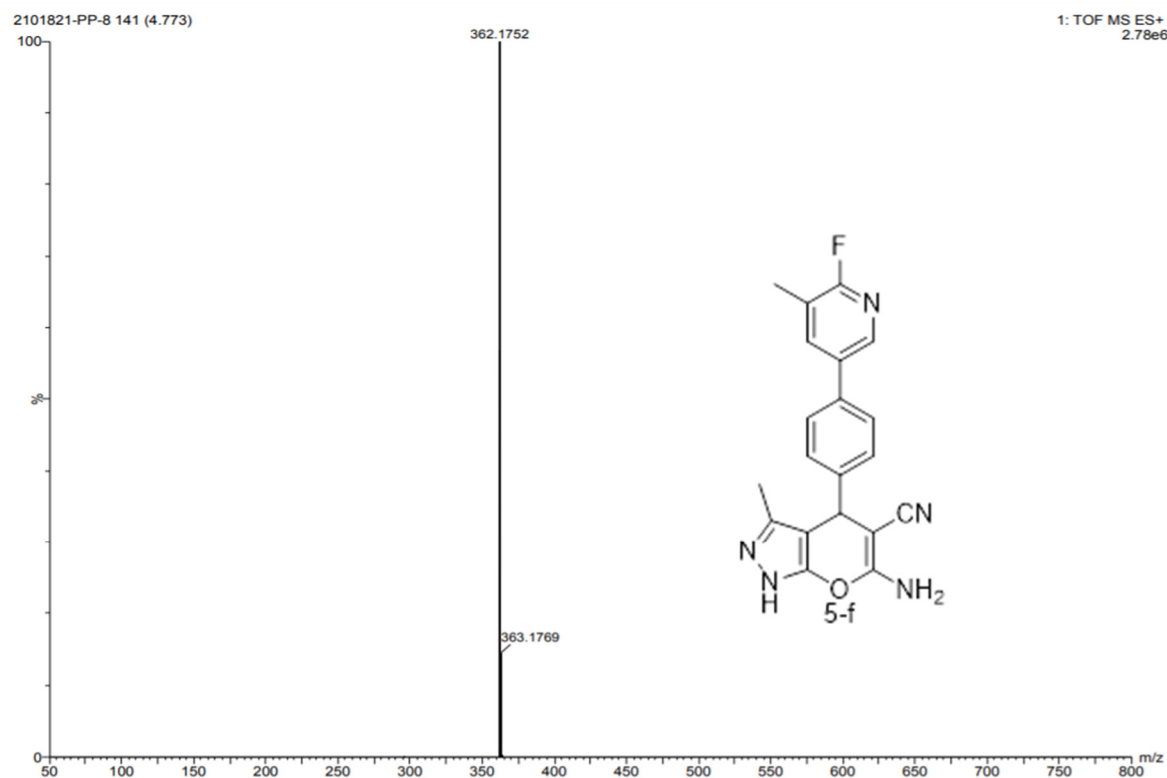

1: TOF MS ES+  
2.78e6

mass spectra of 5-f

MCF-7 log curve of 5-f

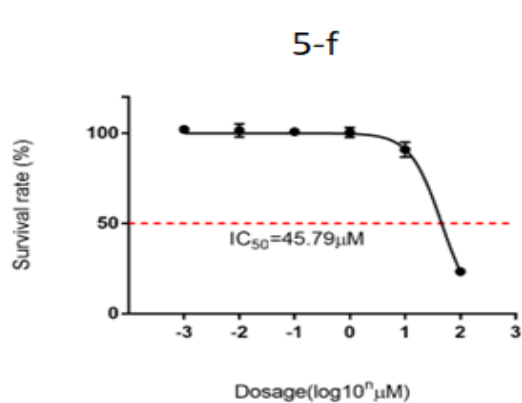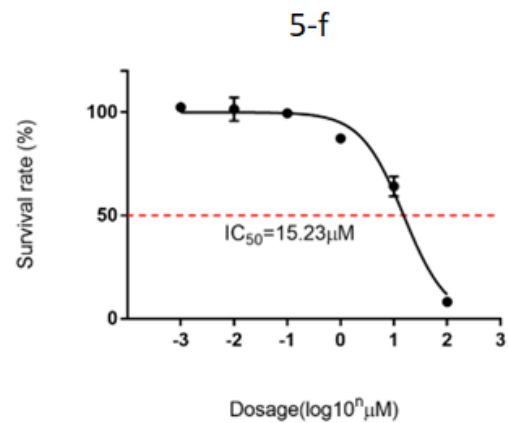

T47D log curve of 5-e

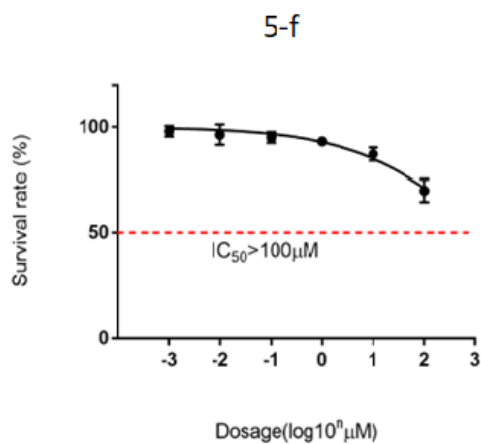

BT474 log curve of 5-e

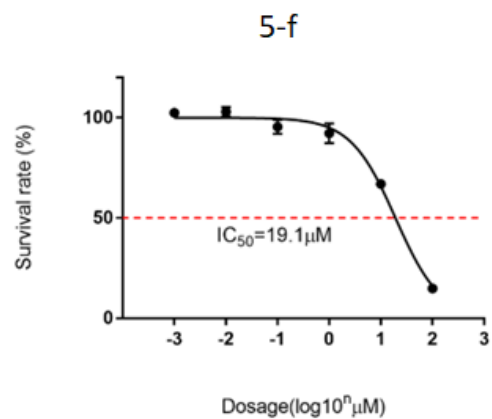

SKBR-3 log curve of 5-e

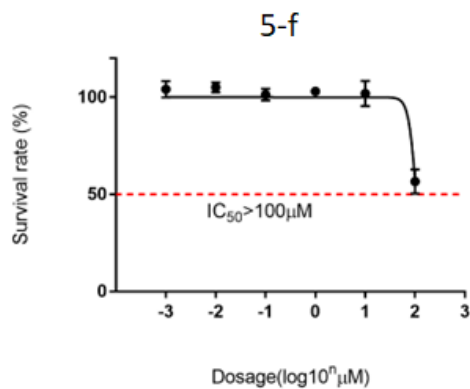

MDAMB-231 log curve of 5-e

MCF-10A log curve of 5-e

---

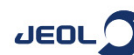

----- PROCESSING PARAMETERS -----  
avg ( 0.31Hz, 0.01s )  
trapezoid( 0%, 0%, 80%, 100% )  
zerofill( 2 )  
Sfr1: 1, TRUE, TRUE  
machinphase  
tgm  
auto\_reference( 5%, TRUE )  
Derived from: PP9\_proton-1-2.jdf

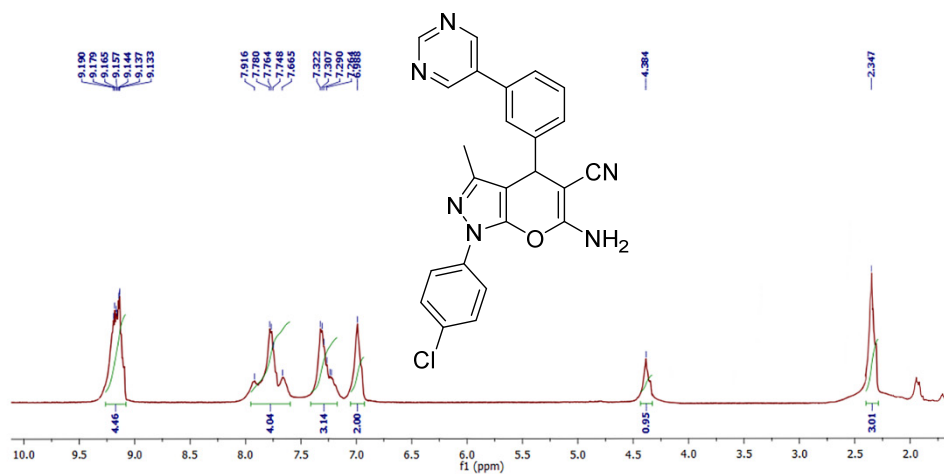

Filename = PP9\_proton-1-2.jdf  
Author = delta  
Experiment = proton\_1xp  
Sample\_id = PP9  
Solvent = DMSO-D6  
Actual\_Start\_Time = 19-JUL-2021 12:25:45  
Revision\_Time = 30-JUL-2021 14:23:39  
Comment = single\_pulse  
Data\_Format = 1D COMPLEX  
Dia\_Size = 39322  
X\_Domain = Proton  
Dia\_Title = Proton  
Dia\_Units = [ppm]  
Dimensions = 1  
Spectrometer = JNM-ECZ400SL  
Field\_Strength = 400.146400 [MHz]  
X\_Acq\_Duration = 1.63577856 [s]  
X\_Domain = Proton  
X\_Freq = 399.78219838 [MHz]  
X\_Offset = 5.5 [ppm]  
X\_Points = 16384  
X\_Fscans = 1  
X\_Resolution = 0.61132969 [Hz]  
X\_Sweep = 10.01402564 [kHz]  
X\_Sweep\_Clip = 8.01282051 [kHz]  
Irr\_Domain = Proton  
Irr\_Freq = 399.78219838 [MHz]  
Irr\_Offset = 5.5 [ppm]  
Tri\_Domain = Proton  
Tri\_Freq = 399.78219838 [MHz]  
Tri\_Offset = 5.5 [ppm]  
Relaxing = 2 [us]  
Clipped = FALSE  
Scans = 8  
Total\_Scans = 8  
Relaxation\_Delay = 5 [s]  
Recvr\_Gain = 56  
Temp\_Set = 21.1 [deg]  
X\_Acq\_Width = 9.785 [us]  
X\_Acq\_Time = 1.63577856 [s]  
X\_Angle = 45 [deg]  
X\_Atn = 4.1 [dB]  
X\_Pulse = 4.9925 [us]  
Irr\_Mode = Off  
Tri\_Mode = Off

<sup>1</sup>H NMR of 5g

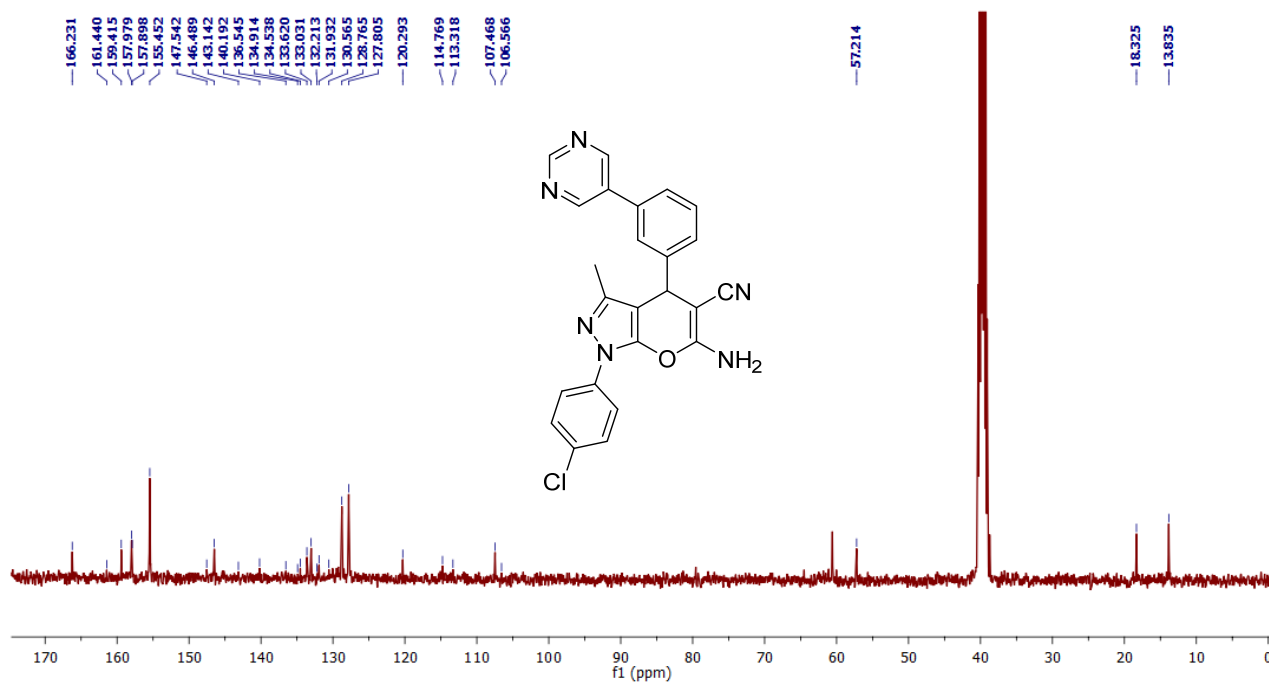

<sup>13</sup>C NMR of 5g

2101953-PP-09 140 (4.739)

1: TOF MS ES+  
1.90e5

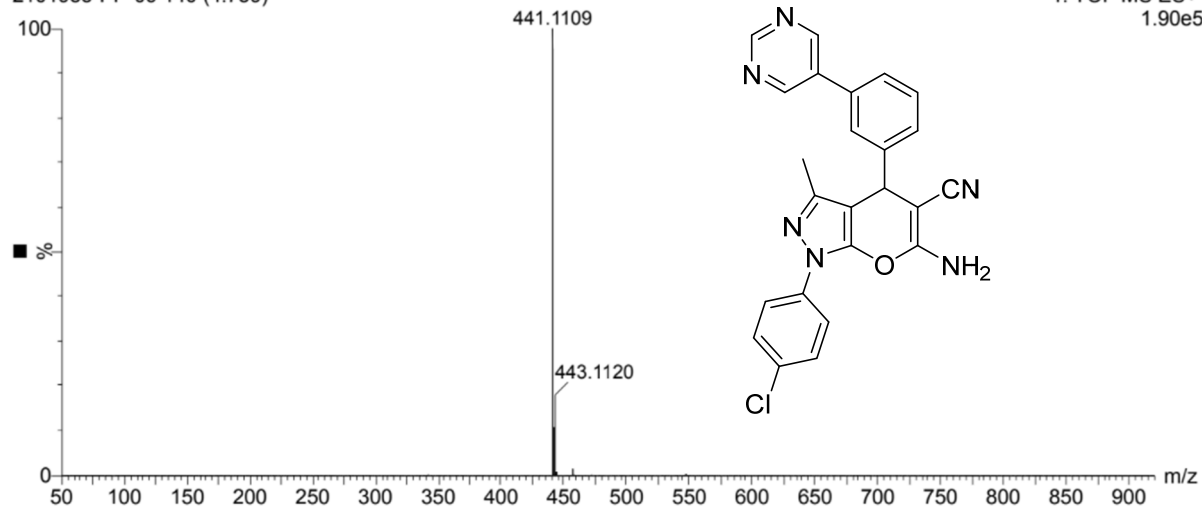

mass spectra of 5g
